# Supplementary material
Source: PubMed Central journal article supplement (PMC4780047)
Supplement: NIHMS757698-supplement-supplemental_figure_1.pdf [file NIHMS757698-supplement-supplemental_figure_1.pdf]

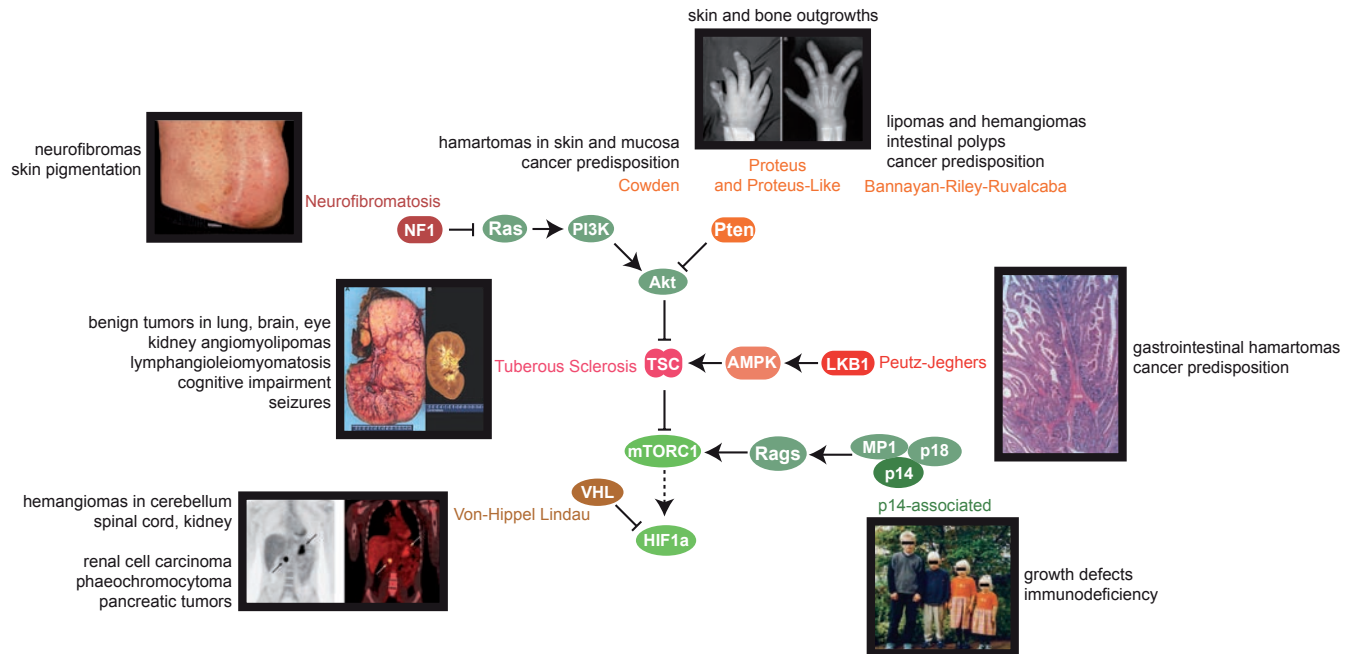

**Supplementary information S1 (figure) | mTOR-related human syndromes**

A series of germline mutations in genes involved in mTOR signaling pathways lead to different syndromes characterized by mTORC1 hyperactivity. With the exception of the syndrome caused by p14 mutation, these syndromes are caused by alterations in tumor suppressor genes, and consequently, are characterized by the spontaneous development of different tumors and other clinical manifestations. Image of gigantism of fingers in Proteus syndrome is reproduced, with permission, from REF. 1 © (2002) Macmillan Publishers Ltd. All rights reserved. Image of neurofibromas and skin pigmentation in neurofibromatosis is reproduced, with permission, from REF. 2 © (2007) Macmillan Publishers Ltd. All rights reserved. Image of intestinal tumor in LKB1 syndrome is reproduced, with permission, from REF. 3 © (2007) Macmillan Publishers Ltd. All rights reserved. Image of renal tumor in tuberous sclerosis is reproduced, with permission, from REF. 4 © (2009) Macmillan Publishers Ltd. All rights reserved. Image of pheochromocytoma and pancreatic endocrine tumor in VHL is reproduced, with permission, from REF. 5 © (2009) Macmillan Publishers Ltd. All rights reserved. Image of short stature and hypopigmentation in p14-associated syndrome is reproduced, with permission, from REF. 6 © (2007) Macmillan Publishers Ltd. All rights reserved.

1. Raju, R.R., Hart, W.R., Magnuson, D.K., Reid, J.R. & Rogers, D.G. Genital tract tumors in Proteus syndrome: report of a case of bilateral paraovarian endometrioid cystic tumors of borderline malignancy and review of the literature. *Mod Pathol* **15**, 172-180 (2002).
2. Ferner, R.E. Neurofibromatosis 1. *Eur J Hum Genet* **15**, 131-138 (2007).
3. Zbuk, K.M. & Eng, C. Hamartomatous polyposis syndromes. *Nat Clin Pract Gastroenterol Hepatol* **4**, 492-502 (2007).
4. Sarraf, M. *et al.* A case of tuberous sclerosis complex that progressed to end-stage renal disease. *Nat Clin Pract Nephrol* **5**, 172-176 (2009).
5. Siroky, B.J., Czyzyk-Krzeska, M.F. & Bissler, J.J. Renal involvement in tuberous sclerosis complex and von Hippel-Lindau disease: shared disease mechanisms? *Nat Clin Pract Nephrol* **5**, 143-156 (2009).
6. Bohn, G. *et al.* A novel human primary immunodeficiency syndrome caused by deficiency of the endosomal adaptor protein p14. *Nat Med* **13**, 38-45 (2007).
